# Supplementary material for: Brain ultrasonography: methodology, basic and advanced principles and clinical applications. A narrative review
Source: Springer Nature journal article supplement (doi:10.1007/s00134-019-05610-4), 2019-04-25
Supplement: MOESM16 [file 16676474]

|  | **N** | **Measured Outcome** | **TCD Measurements** | | | | | | | | | | | | | | | | | | | | | | | | | | | | | | **Comments** |
| --- | --- | --- | --- | --- | --- | --- | --- | --- | --- | --- | --- | --- | --- | --- | --- | --- | --- | --- | --- | --- | --- | --- | --- | --- | --- | --- | --- | --- | --- | --- | --- | --- | --- |
| **PEDIATRIC PATIENTS** | | | | | | | | | | | | | | | | | | | | | | | | | | | | | | | | | |
| Lovett ME et al., 2018 [1] | 26 | GOS-E Ped at 3 months   - GOS ≤ 4 (good): 13 (50%) - GOS ≥ 5 (poor): 13 (50%) | **Outcome** | **Day 0 (< 24 hrs)** | | | | | | | | | | **Day 2 (72 hrs)** | | | | | | | | | | | **Day 4 (120 hrs** | | | | | | | | - Poor outcome group had more extreme MFVMCA (> or < 2SDs); good outcome group spent more time with MFVMCA at normative values - 38% patients in poor group had extreme MFVMCA on day 0 (p = 0.039), and 55% on day 1 (p = 0.023). |
| **MFVMCA (SD)** | | | | **% EFV** | | | | | | **MFVMCA (SD)** | | | | | | **% EFV** | | | | | **MFVMCA (SD)** | | | | **% EFV** | | | |
| Good | 0.65 | | | | 0% (0/13) | | | | | | 1.33 | | | | | | 23% (3/13) | | | | | 0.30 | | | | 11% (1/9) | | | |
| Poor | - 0.52 | | | | 38% (5/13) | | | | | | 2.02 | | | | | | 60% (6/10) | | | | | 1.19 | | | | 57% (4/7) | | | |
| p | - | | | | 0.039 | | | | | | - | | | | | | 0.1 | | | | | - | | | | 0.11 | | | |
| Lin JJ et al., 2015 [2] | 17 | Pediatric CPC at 3 months   - P-CPC 1-2 (good): 8 (47%) - P-CPC ≥3 (poor): 9 (53%) | **Outcome** | **Pre-hypothermia Phase** | | | | | | | | **Hypothermia Phase** | | | | | | | | | | | | | **Rewarming Phase** | | | | | | | | - Diastolic flow reversal or undetectable flow patterns associated with unfavourable outcomes. - Normal MFVMCA in the rewarming phase and normal PI in the hypothermia and rewarming phases associated with favourable outcomes. |
| **MFVMCA** | | | | **PI < 0.6 / PI > 1.1** | | | | **MFVMCA** | | | | | | | | **PI > 1.1** | | | | | **MFVMCA** | | | | | **PI > 1.1** | | |
| Good | Lower: 5  Normal: 1  Higher: 2 | | | | 5 | | | | Lower: 6  Normal: 2  Higher: 0 | | | | | | | | 0 | | | | | Lower: 3  Normal: 5  Higher: 0 | | | | | 1 | | |
| Poor | Lower: 8  Normal: 0  Higher: 0 | | | | 7 | | | | Lower: 8  Normal: 1  Higher: 0 | | | | | | | | 0 | | | | | Lower: 9  Normal: 0  Higher: 0 | | | | | 8 | | |
| p | 0.129 | | | | 0.620 | | | | 0.576 | | | | | | | | 0.002 | | | | | 0.009 | | | | | 0.003 | | |
| **ADULT PATIENTS** | | | | | | | | | | | | | | | | | | | | | | | | | | | | | | | | |  |
| Hoedemaekers CW et al., 2017 [3] | 20 | Survival: S 45%/NS 55% | **Outcome** | **Day 0 (admission)** | | | | | | | | | | | | | | **Day 3 (72 hrs)** | | | | | | | | | | | | | | | No differences between survivors and non-survivors |
| **MFVMCA** | | | | **PI** | | | | | | | | | | **MFVMCA** | | | | | | | **PI** | | | | | | | |
| All patients | 26 [18.6-40.4] | | | | - | | | | | | | | | | 63.9 [48.3-73.1] | | | | | | | - | | | | | | | |
| Van den Brule J et al, 2017 [4] | 11 | Survival: S 64%/NS 36% | **Outcome** | **Day 0 (admission)** | | | | | | | | | | | | | | **Day 3 (72 hrs)** | | | | | | | | | | | | | | | - MFVMCA similar in S and NS at admission - MFVMCA in NS increased more significantly compare to S over the time (p=0.001) - NS had stronger decrease in CVR in NS |
| **MFVMCA** | | | | **CVR** | | | | | | | | | | **MFVMCA** | | | | | | | **CVR** | | | | | | | |
| All patients | 28.0  [25-39] | | | | 3.91  [2.94-5.37]  (high) | | | | | | | | | | 78  [65-123] | | | | | | | 1.35  [0.88-1.81] | | | | | | | |
| Heimburger D et al., 2016 [5] | 51 (82) | CPC at ICU discharge   - CPC 1-2 (good): 29 (55%) - CPC ≥3 (poor): 24 (45%) | **Outcome** | **Day 0** | | | | | | | | | | | | | | | | **Day 1** | | | | | | | | | | | | | - No differences in MFVMCA and PI between poor and good outcome patients at 24 and 48 hrs. - However, for all subjects, MFVMCA significantly higher at 48 h compared with 24 h (45 vs 37 cm/s - p = 0.001). |
| **n** | **MFVMCA** | | | | | **PI** | | | | | | | | | | **n** | | | **MFVMCA** | | | | | **PI** | | | | |
| Good | 23 | 38 [35–56] | | | | | 0.9 [0.7–1.2] | | | | | | | | | | 19 | | | 55 [39–64] | | | | | 0.8 [0.6–1.1] | | | | |
| Poor | 28 | 40 [33–58] | | | | | 0.9 [0.7–1.1] | | | | | | | | | | 27 | | | 42 [38–62] | | | | | 0.9 [0.8–1.1] | | | | |
| p |  | 0.94 | | | | | 0.52 | | | | | | | | | |  | | | 0.47 | | | | | 0.20 | | | | |
| Doepp F et al., 2014 [6] | 41 (53) | CPC at ICU discharge   - CPC 1-2 (good): 29 (55%) - CPC ≥3 (poor): 24 (45%) | **Outcome** | **< 48 hrs** | | | | | | | | | **Day 3-5** | | | | | | | | | | | | **Day 7-10** | | | | | | | | - No correlation found between CBF and outcome at either of the 3 defined time points. - Therapeutic hypothermia did not demonstrate distinct effects on cerebral blood flow. |
| **MFVMCA (n)** | | | | **PI (n)** | | | | | **MFVMCA (n)** | | | | | | | **PI (n)** | | | | | **MFVMCA (n)** | | | | **PI (n)** | | | |
| Good | 45±23  (32) | | | | 1.4 ± 0.5 (32) | | | | | 51±18  (26) | | | | | | | 1.2 ± 0.3 (26) | | | | | 51±16  (19) | | | | 1.2 ± 0.2 (18) | | | |
| Poor | 53±19  (41) | | | | 1.0 ± 0.4 (41) | | | | | 68±23  (26) | | | | | | | 1.2 ± 0.5 (24) | | | | | 48±11  (16) | | | | 1.4 ± 0.4 (15) | | | |
| p | 0.06 | | | | 0.01 | | | | | 0.01 | | | | | | | 0.36 | | | | | 0.60 | | | | 0.12 | | | |
| Bisschops LLA et al., 2012 [7] | 10 | ICU Survival: S 40% / NS 60% | **Outcome** | **Pre-hypothermia Phase** | | | | | | | | | **End of hypothermia Phase (72 hrs)** | | | | | | | | | | | | **Post hypothermia phase**  **(108 hrs)** | | | | | | | | CBF low after cardiac arrest, gradually increased during 72 hrs cooling period.  Temperature by itself probably not a major determinant in regulation of CBF after cardiac arrest. |
| **MFVMCA (n)** | | | | **PI (n)** | | | | | **MFVMCA (n)** | | | | | | | **PI (n)** | | | | | **MFVMCA (n)** | | | | **PI (n)** | | | |
| All patients | 26.5  [18.7–48.0] | | | | 1.23  [0.94–1.45] | | | | | 63.9  [45.6–65.6] | | | | | | | 1.00  [0.88–1.57] | | | | | 71.5  [56.0–78.5] | | | | 1.27  [1.15–1.32] | | | |
| Lemiale V et al., 2008 [8] | 18 | Survival at 28 days:  S 34% / NS 66% | **Outcome** | **Day 0** | | | | | | | **Day 1** | | | | | | | | | **Day 2** | | | | | | **Day 3** | | | | | | | No significant difference between survivors and non-survivors at any time point (MFV, dFV and PI), except that higher dFV in survivors at 72 hrs (39.6 cm/s versus 29.3 cm/s, *p* = 0.013) |
| **MFVMCA** | | | **PI** | | | | **MFVMCA** | | | | | | **PI** | | | **MFVMCA** | | | | **PI** | | **MFVMCA** | | | | | **PI** | |
| All patients | 27.3  [21.5-33.6] | | | 1.6  [1.3-1.9] | | | | ↑ | | | | | | ↓ | | | ↑ | | | | ↓ | | 50.5  [36.7– 58.1] | | | | | ↓ | |
| Wessels T et al., 2006 [9] | 39 | Survival: S 44% / NS 56% | **Outcome** | **Day 0 (+4 hrs)** | | | | | | **Day 1** | | | | | | | | | | | **Day 2** | | | | | **Day 3** | | | | | | | Higher PSV and EDV 4, 24 and 72 h after CPR in survivors |
| **MCA Sys/Dia** | | | **RI** | | | **MCA Sys/Dia** | | | | | | **RI** | | | | | **MCA Sys/Dia** | | | **RI** | | **MCA Sys/Dia** | | | | | **RI** | |
| Survivors | 82/31 | | | 0.61 | | | 96/43 | | | | | | 0.57 | | | | | - | | | - | | 101/42 | | | | | 0.59 | |
| Non-survivors | 67/24 | | | 0.65 | | | 77/30 | | | | | | 0.61 | | | | | - | | | - | | 80/36 | | | | | 0.58 | |
| p | 0.01 | | | ns | | | ns | | | | | | ns | | | | | - | | | - | | 0.03 | | | | | ns | |
| Buunk G et al, 1999 [10] | 30 | CPC   - CPC 1-2 (good): 9 (30%) - CPC ≥3 (poor): 21 (70%) | **Outcome** | **T0**  **(post-resuscitation)** | | | | | **T1**  **(6 hrs)** | | | | | | | | | | **T2**  **(12 hrs)** | | | | | | | | **T3**  **(24 hrs)** | | | | | | NS showed a gradual decrease in PI and an increase in MFVMCA  S showed also a gradual but not significant decrease in PI and increase in MFVMCA |
| **MFVMCA** | | **PI** | | | **MFVMCA** | | | | | | **PI** | | | | **MFVMCA** | | | **PI** | | | | | **MFVMCA** | | | | | **PI** |
| Good | 31  ±11 | | 1.38  ±0.34 | | | 43  ±14 | | | | | | 1.42  ±0.56 | | | | 43  ±15 | | | 1.27  ±0.45 | | | | | 49  ±20 | | | | | 1.16  ±0.32 |
| Poor | 32 ±12 | | 1.60  ±0.86 | | | 52  ±25 | | | | | | 1.24  ±0.49 | | | | 58  ±22 | | | 1.05  ±0.33 | | | | | 67  ±24 | | | | | 1.00  ±0.25 |
| Iida et al., 1997 [11] | 8 | NR | **Outcome** | **T0 (4-12)** | | | | | | | | | **T1 (12-24)** | | | | | | | | | | | | **T2 (24-120)** | | | | | | | |  |
| **MFVMCA** | | | | **PI** | | | | | **MFVMCA** | | | | | | | **PI** | | | | | **MFVMCA** | | | | **PI** | | | |
| All patients | 41.5±14.1 | | | | 1.1±0.25 | | | | | 70.1±20 | | | | | | | 0.93±0.27 | | | | | 117.5±17.3 | | | | 0.57±0.16 | | | |
| Tab. ESM Table 2b. Summary of studies exploring US-TCD prognostic performance | | | | | | | | | | | | | | | | | | | | | | | | | | | | | | | | | |
| CPC: Cerebral Performance Category; CVR: Cerebrovascular Resistance; Dia: Diastolic; SD: standard deviations from previously published normative values for children of similar age and gender; EDV: End Diastolic Velocity;EFV: Extreme flow velocity (=a value greater than or less than two standard deviations from normative); GOS-E: Extended Glasgow Outcome Scale, dFV: Diastolic Flow Velocity; MFVMCA: Mean Flow Velocity Middle Cerebral Artery; NR: not reported; NS: Non-survivors; PI: Pulsatility Index; PSV: Peak Systolic Velocity; RI: Resistivity Index; Sys: Systolic; S: Survivors. | | | | | | | | | | | | | | | | | | | | | | | | | | | | | | | | | |
|  | | | | | | | | | | | | | | | | | | | | | | | | | | | | | | | | | |

1. Lovett ME, Maa T, Chung MG, O’Brien NF (2018) Cerebral blood flow velocity and autoregulation in paediatric patients following a global hypoxic-ischaemic insult. Resuscitation 126:191–196. https://doi.org/10.1016/j.resuscitation.2018.02.005

2. Lin JJ, Hsia SH, Wang HS, et al (2015) Transcranial Doppler ultrasound in therapeutic hypothermia for children after resuscitation. Resuscitation 89:182–187. https://doi.org/10.1016/j.resuscitation.2015.01.029

3. Hoedemaekers CW, Ainslie PN, Hinssen S, et al (2017) Low cerebral blood flow after cardiac arrest is not associated with anaerobic cerebral metabolism. Resuscitation 120:45–50. https://doi.org/10.1016/j.resuscitation.2017.08.218

4. van den Brule JMD, Vinke E, van Loon LM, et al (2017) Middle cerebral artery flow, the critical closing pressure, and the optimal mean arterial pressure in comatose cardiac arrest survivors—An observational study. Resuscitation 110:85–89. https://doi.org/10.1016/j.resuscitation.2016.10.022

5. Heimburger D, Durand M, Gaide-Chevronnay L, et al (2016) Quantitative pupillometry and transcranial Doppler measurements in patients treated with hypothermia after cardiac arrest. Resuscitation 103:88–93. https://doi.org/10.1016/j.resuscitation.2016.02.026

6. Doepp F, Reitemeier J, Storm C, et al (2014) Duplex sonography of cerebral blood flow after cardiac arrest-A prospective observational study. Resuscitation 85:516–521. https://doi.org/10.1016/j.resuscitation.2013.12.021

7. Bisschops LLA, Van Der Hoeven JG, Hoedemaekers CWE (2012) Effects of prolonged mild hypothermia on cerebral blood flow after cardiac arrest. Crit Care Med 40:2362–2367. https://doi.org/10.1097/CCM.0b013e318255d983

8. Lemiale V, Huet O, Vigué B, et al (2008) Changes in cerebral blood flow and oxygen extraction during post-resuscitation syndrome. Resuscitation 76:17–24. https://doi.org/10.1016/j.resuscitation.2007.06.028

9. Wessels T, Harrer JU, Jacke C, et al (2006) The prognostic value of early transcranial doppler ultrasound following cardiopulmonary resuscitation. Ultrasound Med Biol 32:1845–1851. https://doi.org/10.1016/j.ultrasmedbio.2006.06.023

10. Buunk G, Van Der Hoeven JG, Meinders AE (1999) Prognostic significance of the difference between mixed venous and jugular bulb oxygen saturation in comatose patients resuscitated from a cardiac arrest. Resuscitation 41:257–262. https://doi.org/10.1016/S0300-9572(99)00060-X

11. Iida K, Satoh H, Arita K, et al (1997) Delayed hyperemia causing intracranial hypertension after cardiopulmonary resuscitation. Crit Care Med 25:971–976. https://doi.org/10.1097/00003246-199706000-00013
